# Supplementary material for: Experiments with large number of GNSS-RO observations through the ROMEX collaboration in the Met Office NWP system
Source: Copernicus journal article supplement (doi:10.5194/egusphere-2025-4194), 2025-09-03
Supplement: Supplementary file [file egusphere-2025-4194-EC1-supplement.pdf]

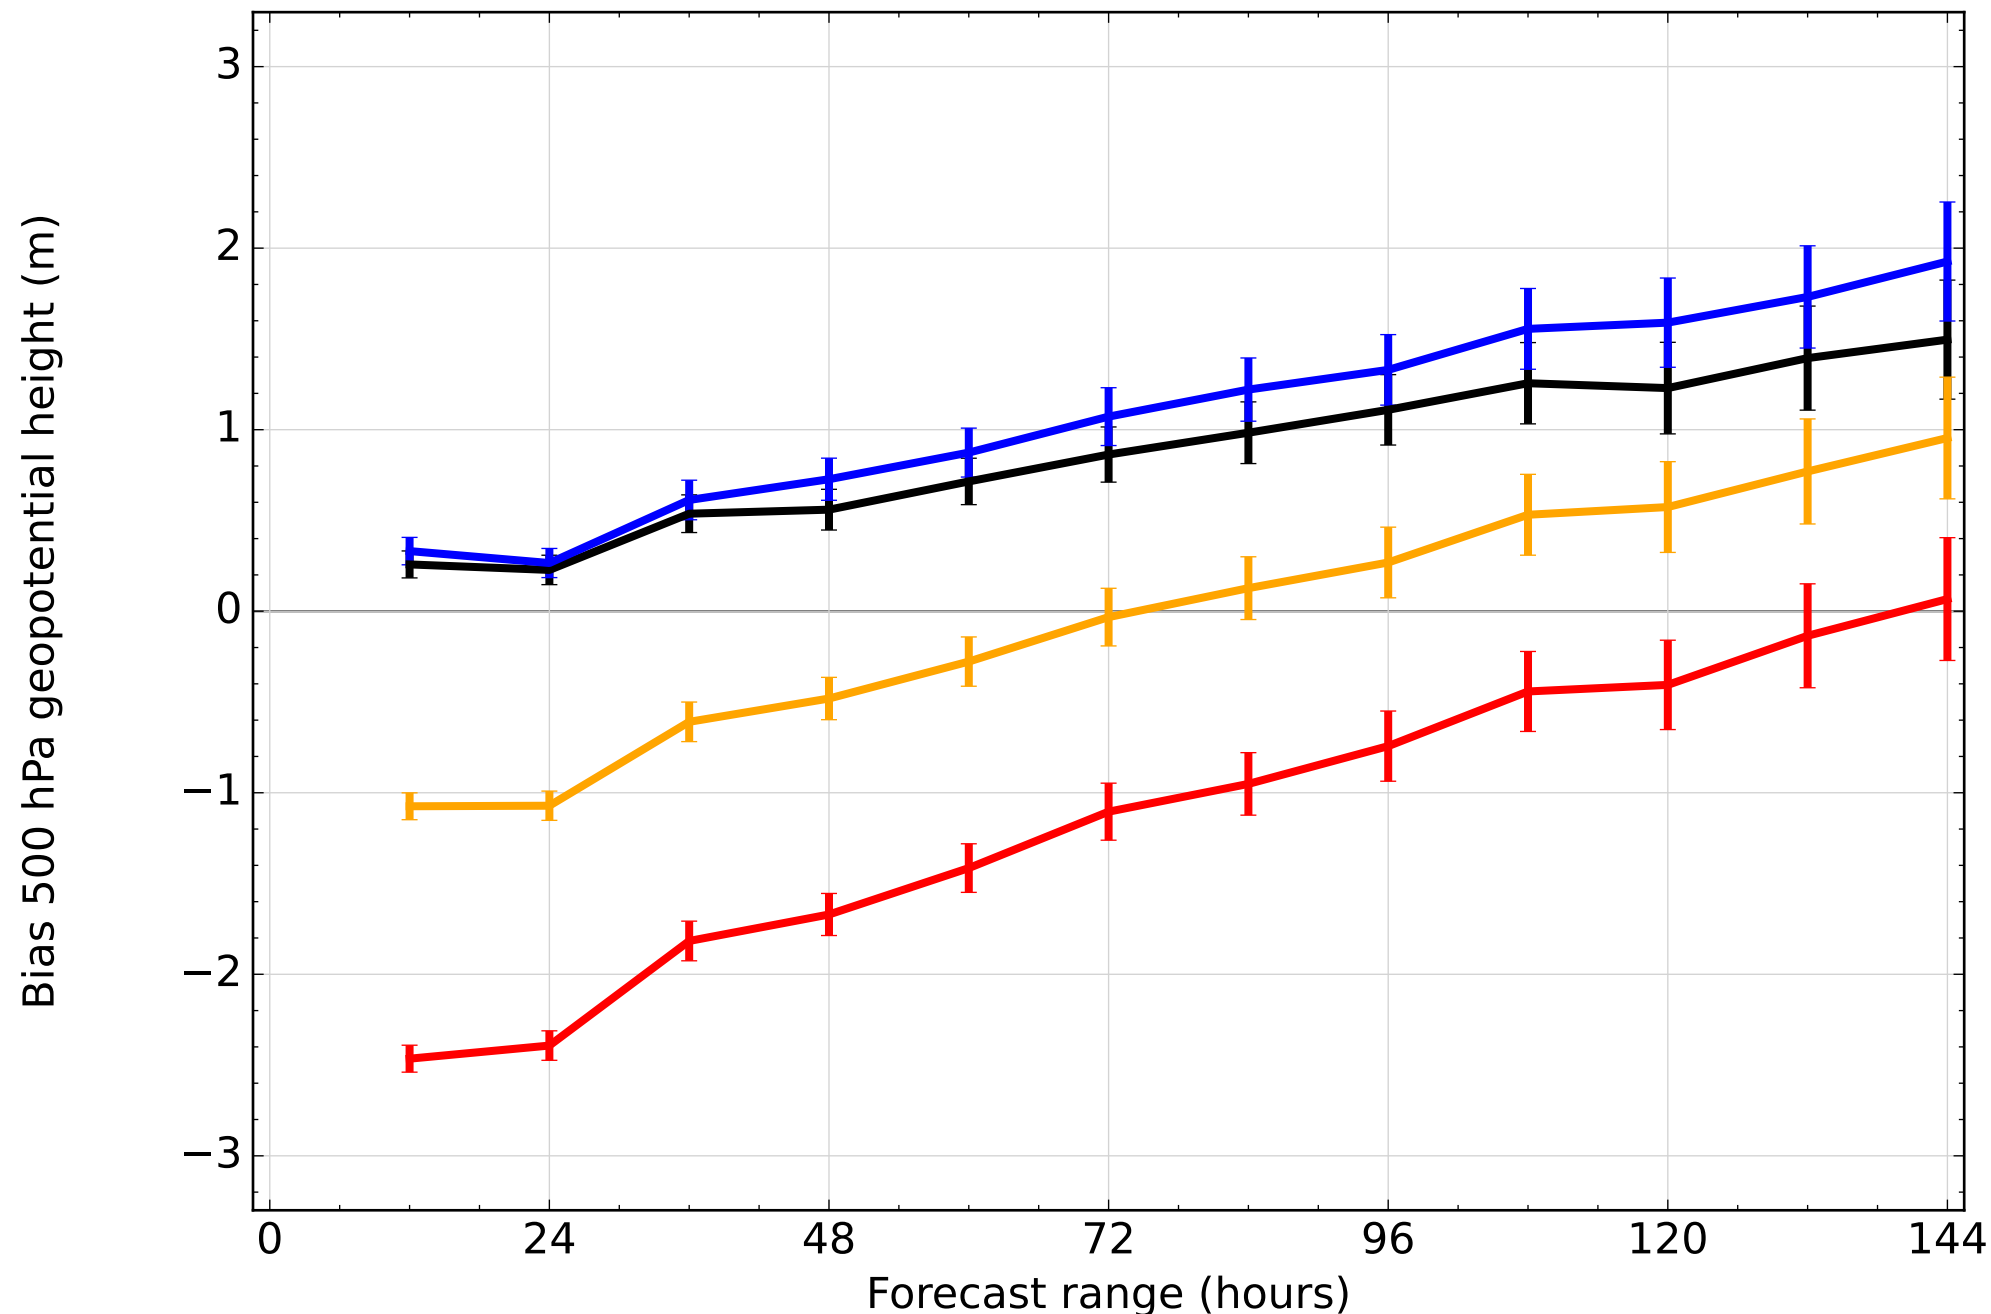

95% confidence intervals calculated from SE assuming independent observations
